# Supplementary material for: An image processing approach to computing distances between RNA secondary structures dot plots
Source: PubMed Central journal article supplement (PMC2677394; doi:10.1186/1748-7188-4-4), 2009-02-09
Supplement: 1748-7188-4-4-S1.pdf [file 1748-7188-4-4-S1.pdf]

# *An Image Processing Approach to Computing Distances Between RNA Secondary Structures Dot Plots*

## Supplementary Data

The following Dataset was used in the Results section of the article:

- Dataset of the Ribosomal RNA fragments of *Thermus thermophilus* HB8 based on [1] containing the following 21 fragments:

>Entry:A\_(765-816) Length:52 Origin:rRNA of the *Thermus thermophilus* [AC:NC\_006461]  
gaaagcguggggagcaaaccggauuagauacccggguaguccacgcccuaaa

>Entry:E\_(68) Length:46 Origin:rRNA of the *Thermus thermophilus* [AC:NC\_006461]  
ccggaaggucaaggggaggggugcaagccccgaaccgaagccccgg

>Entry:A\_(1241-1296) Length:56 Origin:rRNA of the *Thermus thermophilus* [AC:NC\_006461]  
gccacuacaaagcgaugccaccggcaacggggagcuaaucgcaaaaaggugggc

>Entry:A\_(820-879) Length:53 Origin:rRNA of the *Thermus thermophilus* [AC:NC\_006461]  
gcgcgcuaggucucugggucuccuggggccgaagcuaacgcguuaagcgcgc

>Entry:A\_(588-651) Length:64 Origin:rRNA of the *Thermus thermophilus* [AC:NC\_006461]  
gccuggggcgucccaugugaagaccacggcuaaccgugggggagcgugggauacgcucaggc

>Entry:A\_(995-1045) Length:55 Origin:rRNA of the *Thermus thermophilus* [AC:NC\_006461]  
augcuaggaaccgggugaaagccuggggugccccgcgaggggagcccuagcac

>Entry:B\_(1052-1107) Length:56 Origin:rRNA of the *Thermus thermophilus* [AC:NC\_006461]  
ccaggagguuggcuuagaagcagccauccuuuaagagugcguaauagcucacugg

>Entry:B\_(589-668) Length:82 Origin:rRNA of the *Thermus thermophilus* [AC:NC\_006461]  
cacggucguggggcagcuaaagccguugagggcggagcguagggaaaccgaguccgaacagggcgucuaaguccgcggccgug

>Entry:A\_(136-227) Length:93 Origin:rRNA of the *Thermus thermophilus* [AC:NC\_006461]  
ccggaagaggggacaaccggggaacucgggcuauccccauguggaccgccccuugggguguguccaaagggcuuug  
cccguuccgg

>Entry:A\_(1113-1187) Length:74 Origin:rRNA of the *Thermus thermophilus* [AC:NC\_006461]  
ccccccguuaguugccagcggguucggccggcacucuaacgggacugcccgcgaaagcgggaggaaggagggg

>Entry:B\_(865-911) Length:46 Origin:rRNA of the *Thermus thermophilus* [AC:NC\_006461]  
cacugauagggcuagggggcccaccagccuaccaaaccuguaaa

>Entry:E\_(2676-2731) Length:57 Origin:rRNA of the *Thermus thermophilus* [AC:NC\_006461]  
cgcaccucugguuuccagcuguccuccaggggcagaagcuggguagccaugugcg

>Entry:E\_(99,100,101) Length:79 Origin:rRNA of the *Thermus thermophilus* [AC:NC\_006461]  
ggaccggggaagaccaccggguggaugggcccggggguguaagcggcgaggcguugagccgaccggucccaaucgucc

>Entry:E\_(90,91,92) Length:76 Origin:rRNA of the *Thermus thermophilus* [AC:NC\_006461]  
cggcucgucgcauccuggggcugaagaagguccaagggguugggcuguucgcccauuaaagcggcacgcgagcugg

>Entry:E\_(89) Length:43 Origin:rRNA of the *Thermus thermophilus* [AC:NC\_006461]  
ggcugaucucccccgagcguccacagcggcgaggguuuggc

>Entry:D\_(8,9,10) Length:53 Origin:rRNA of the *Thermus thermophilus* [AC:NC\_006461]  
aaugggggaaccggccggcggaacccggucaccgcgcuuuugcgcggggg

>Entry:A\_(1420-1480) Length:56 Origin:rRNA of the *Thermus thermophilus* [AC:NC\_006461]  
cgggcucuaccgaagucgccgggagccuacggcgaggcggcgggaggguccg

>Entry:A\_(240-286) Length:47 Origin:rRNA of the *Thermus thermophilus* [AC:NC\_006461]  
cccaucagcuaguugguggguaauggccaccaagcgcgacgagcggg

>Entry:A\_(442-492) Length:41 Origin:rRNA of the *Thermus thermophilus* [AC:NC\_006461]  
cccgggacgaaaccccgacgaggggacugacgguaccggg

>Entry:E\_(65,66) Length:57 Origin:rRNA of the *Thermus thermophilus* [AC:NC\_006461]  
acuguuuacaaaaacacagcucucugcgaacucguaagaggagguauagggagcga

>Entry:E\_(86,87) Length:39 Origin:rRNA of the *Thermus thermophilus* [AC:NC\_006461]  
gacugcaggccugcaagccgagcagggcgaaagccgg

## Bibliography

1. Yusupov MM, Yusupova GZ, Baucom A, Lieberman K, Earnest TN, Cate JH, Noller HF: Crystal structure of the ribosome at 5.5 Å resolution. *Science* 2001, 292:883–896.
