# Supplementary material for: An image processing approach to computing distances between RNA secondary structures dot plots
Source: Springer Nature journal article supplement (doi:10.1186/1748-7188-4-4), 2009-02-09
Supplement: 13015_2007_61_MOESM4_ESM.pdf [file 13015_2007_61_MOESM4_ESM.pdf]

Non Designable Motif Tripod

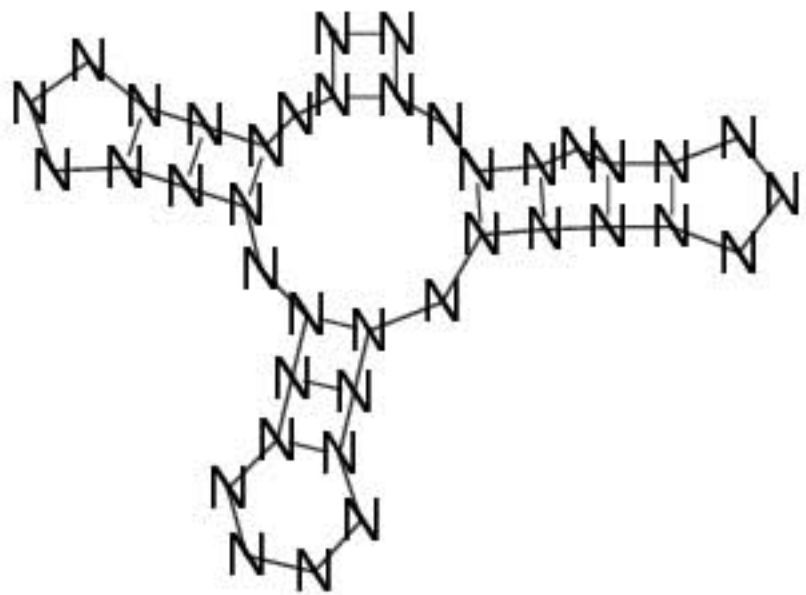

(A)

Closest Candidate with  
DoPloCompare Distance

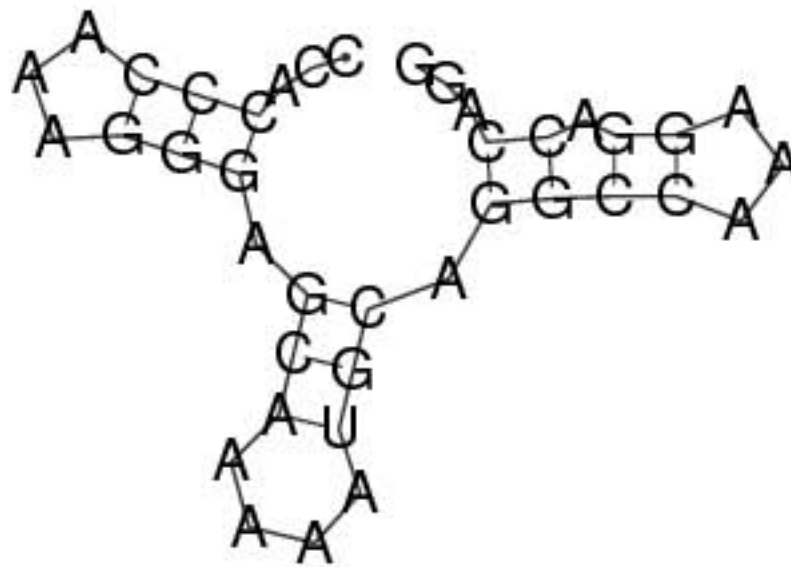

(B)

Closest Candidate with  
Base Pairing Distance

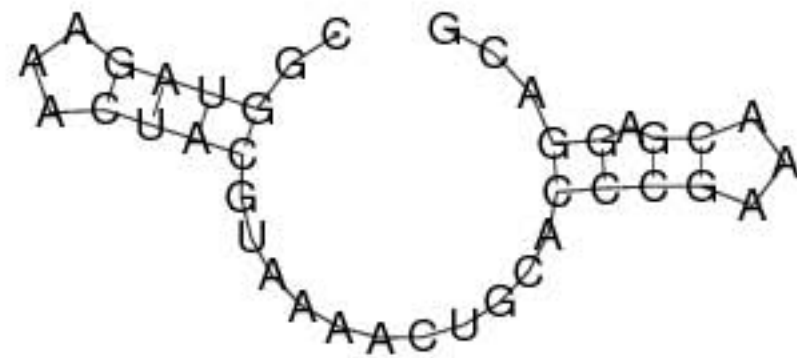

(C)
