# Supplementary material for: An image processing approach to computing distances between RNA secondary structures dot plots
Source: Springer Nature journal article supplement (doi:10.1186/1748-7188-4-4), 2009-02-09
Supplement: 13015_2007_61_MOESM7_ESM.pdf [file 13015_2007_61_MOESM7_ESM.pdf]

Wildtype

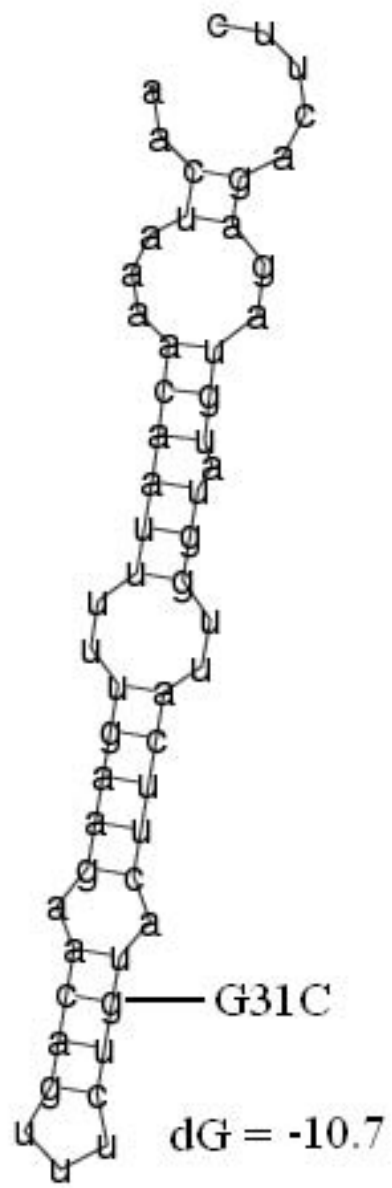

Largest Dot Plot Difference and  
Largest RNAdistance Grade

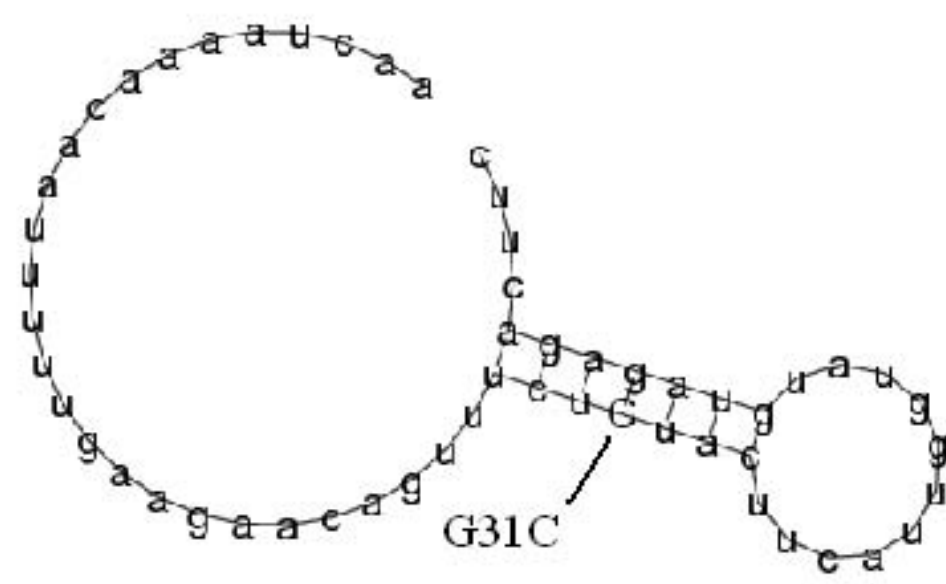

|        |       |
|--------|-------|
| DPlt:  | 0.395 |
| Rdist: | 52    |

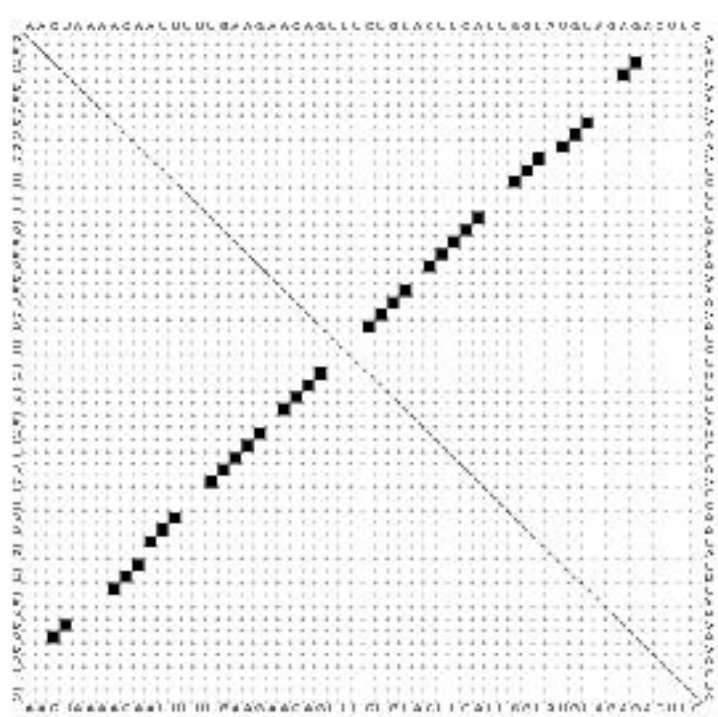

(A)

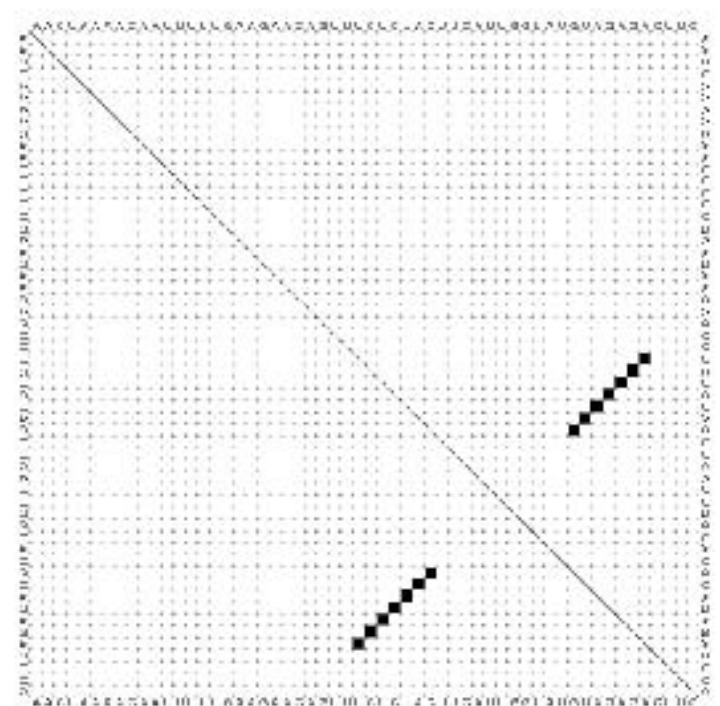

(B)
