# Supplementary material for: An image processing approach to computing distances between RNA secondary structures dot plots
Source: Springer Nature journal article supplement (doi:10.1186/1748-7188-4-4), 2009-02-09

Dot Plot Matrix

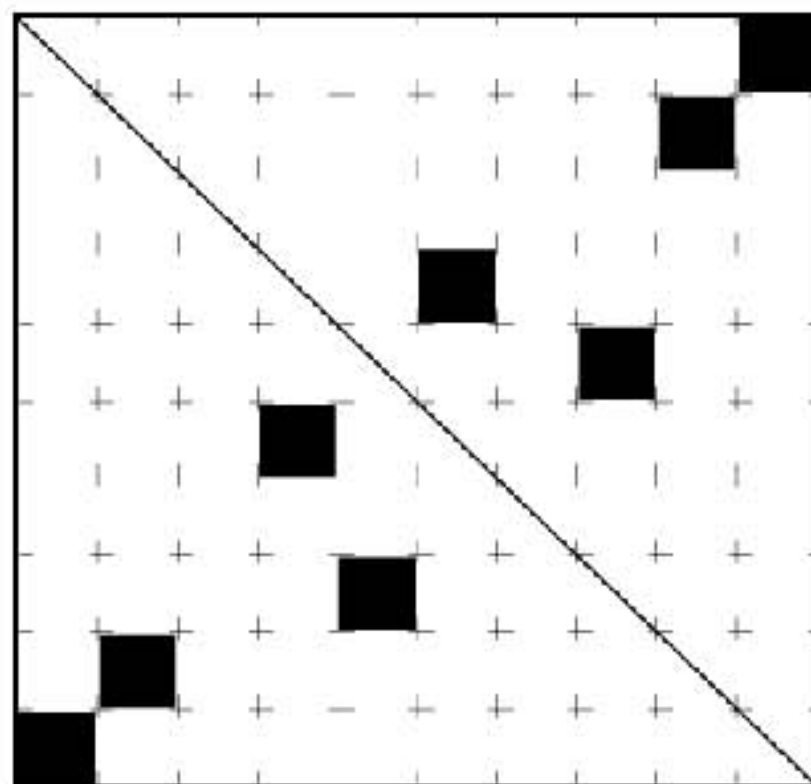

X Sum Vector

Magnitude

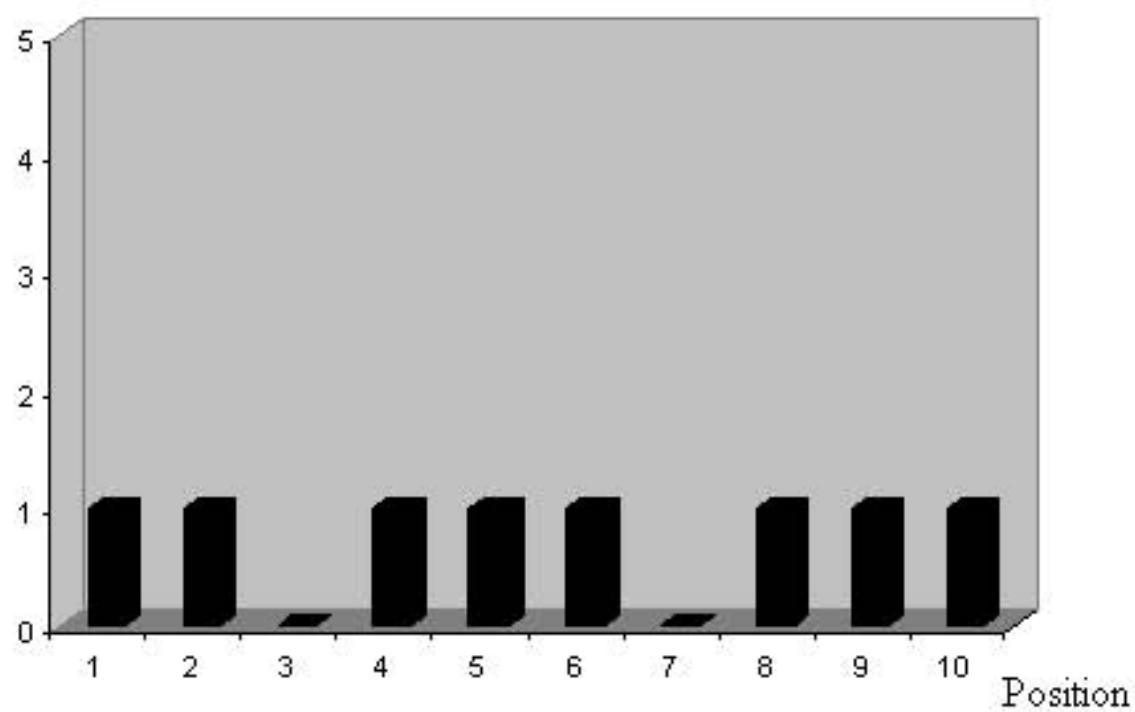

Y Sum Vector

Magnitude

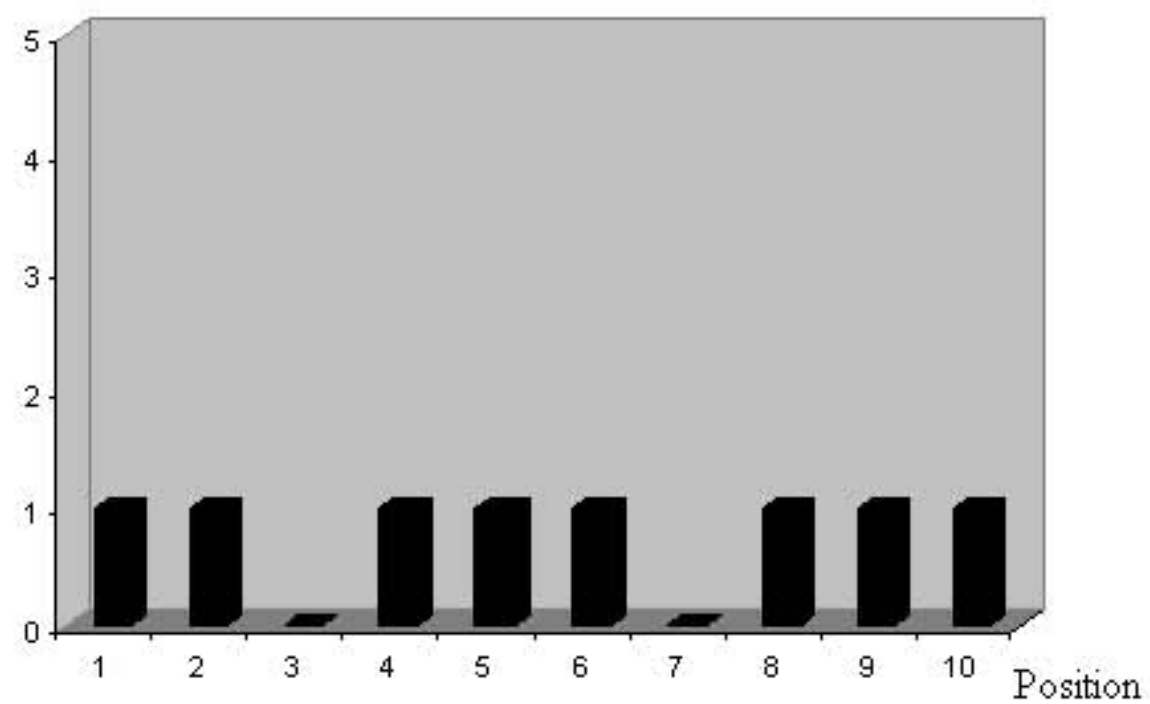

Diagonal SW-NE Sum Vector

Magnitude

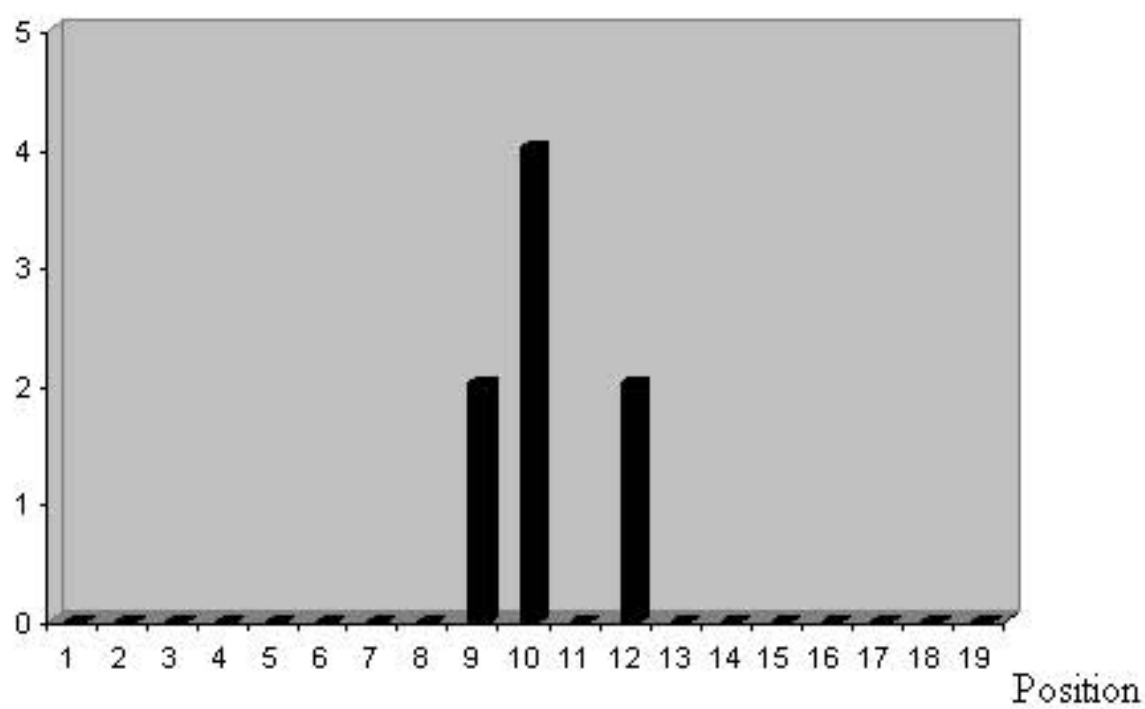

Inverse Diagonal SE-NW Sum Vector

Magnitude

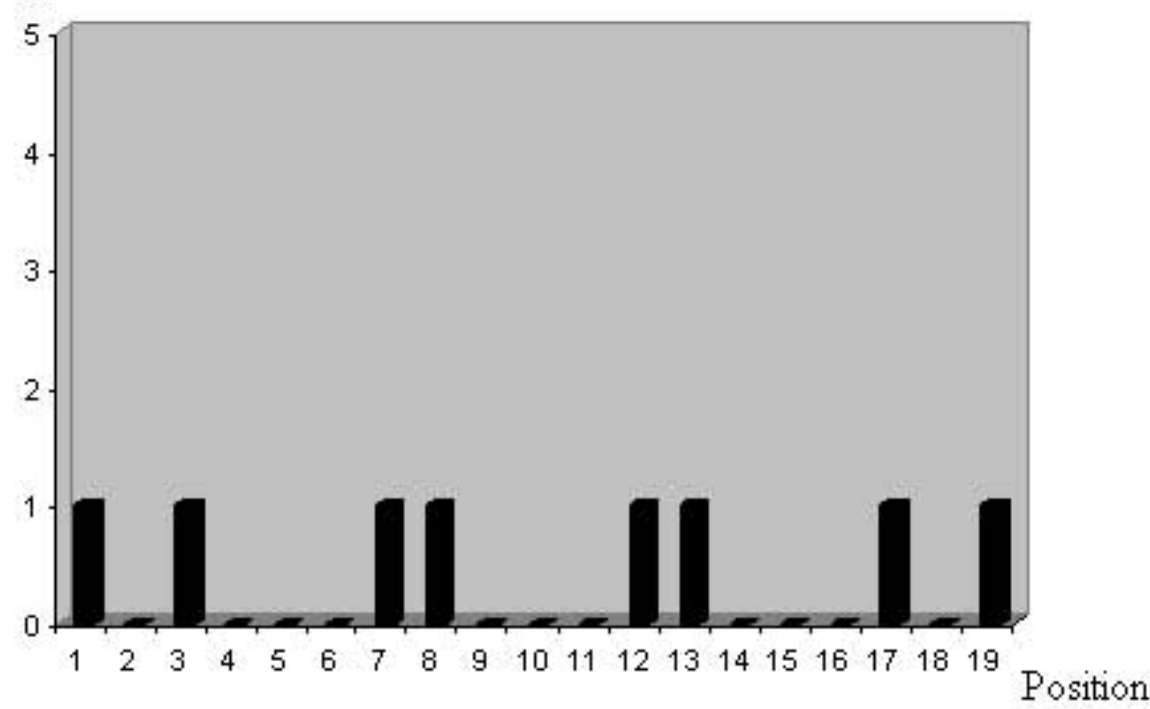

Supplement: 13015_2007_61_MOESM11_ESM.pdf [file 13015_2007_61_MOESM11_ESM.pdf]
